# Supplementary material for: Multi-angle evaluation of kinetic Monte-Carlo simulations as tool to evaluate the distributed monomer composition in gradient copolymer synthesis
Source: Royal Society of Chemistry journal article supplement (doi:10.1039/d3re00274h), 2023-01-01
Supplement: d3re00274h1.pdf [file d3re00274h1.pdf]

# Supporting Information for “Multi-angle evaluation of kinetic Monte-Carlo simulations as a tool to evaluate the distributed monomer composition in gradient copolymer synthesis”

Robert Conka,<sup>1,2</sup> Yoshi W. Marien,<sup>2</sup> Paul H.M. Van Steenberge,<sup>2</sup> Richard Hoogenboom,<sup>1,\*</sup>  
Dagmar R. D’hooge<sup>2,3,\*</sup>

<sup>1</sup>Supramolecular Chemistry Group, Centre of Macromolecular Chemistry (CMaC), Department of Organic and Macromolecular Chemistry, Ghent University, Krijgslaan 281-S4, 9000 Gent, Belgium.

<sup>2</sup>Laboratory for Chemical Technology (LCT), Department of Materials, Textiles and Chemical Engineering, Ghent University, Technologiepark 125, 9052 Zwijnaarde, Belgium.

<sup>3</sup>Centre for Textile Science and Engineering (CTSE), Department of Materials, Textiles and Chemical Engineering, Ghent University, Technologiepark 70a, 9052 Zwijnaarde, Belgium.

\*Corresponding authors: [richard.hoogenboom@ugent.be](mailto:richard.hoogenboom@ugent.be), [dagmar.dhooge@ugent.be](mailto:dagmar.dhooge@ugent.be)

## Table of Contents

|   |                                                          |     |
|---|----------------------------------------------------------|-----|
| 1 | Ideal copolymer samples .....                            | S2  |
| 2 | Real CROP conditions without side reactions .....        | S3  |
| 3 | Real CROP and ATRP products without side reactions ..... | S8  |
| 4 | Real CROP products with side reactions .....             | S12 |

# 1 EXTRA ANALYSIS FOR IDEAL COPOLYMER SAMPLES

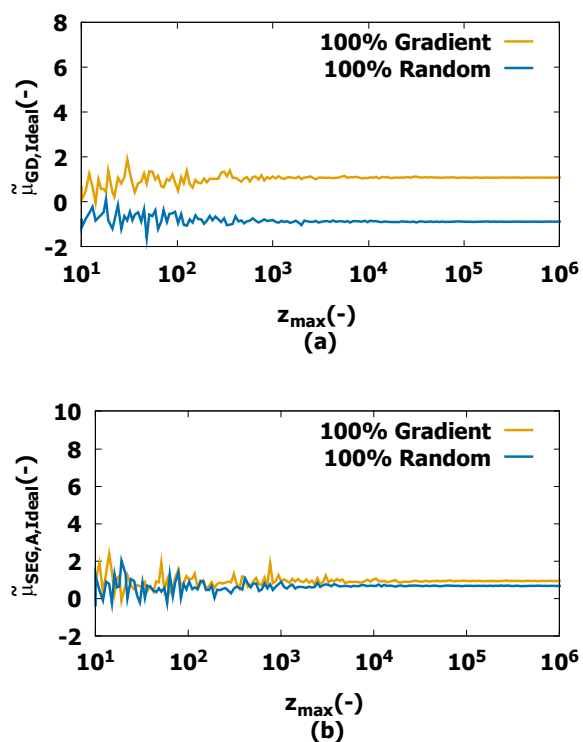

Figure S1. The skewness of a full gradient copolymer product (*cf.* P6=T1 in main text; orange lines) and of a fully randomly distributed copolymer product (*cf.* P10 in main text; blue lines) of the  $GD$  (a) and  $^{SEG}_A$  (b) for various sample sizes. It follows that simulation size of  $10^6$  chains suffices to gain reliable results.

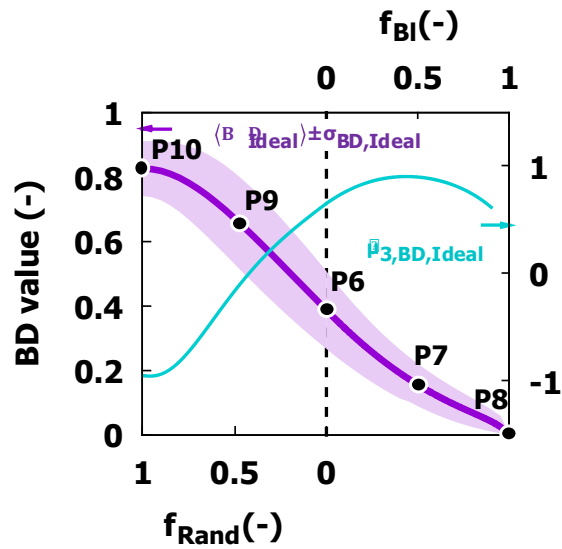

Figure S2. Transforming a targeted block structure (P8 in Figure 4(b) in the main text;  $f_{Gr}=0$ ;  $f_{Bl}=1$ ) into ideal gradient structures ( $f_{Gr}=1$ ) or random structures ( $f_{Rand}=1$ ) shows a continuous increase in the measured  $\langle BD_{Ideal} \rangle_{\pm \sigma_{BD, Ideal}}$  while also a negative skewness  $\tilde{\mu}_{3, BD, Ideal}$  is associated with (highly) randomly distributed copolymer products. Note that for P8 a  $\langle BD \rangle$  of 0 is reached as the mathematical definition of monomer inclusion probabilities include only integer numbers, which exist exclusively in a generated copolymer sample. High  $\langle BD \rangle$  values, in combination with  $\langle GD \rangle$  values of around 0.5, can as such be used to distinguish random or alternating structures.

## 2 EXTRA SIMULATION RESULTS FOR REAL CROP CONDITIONS WITHOUT SIDE REACTIONS

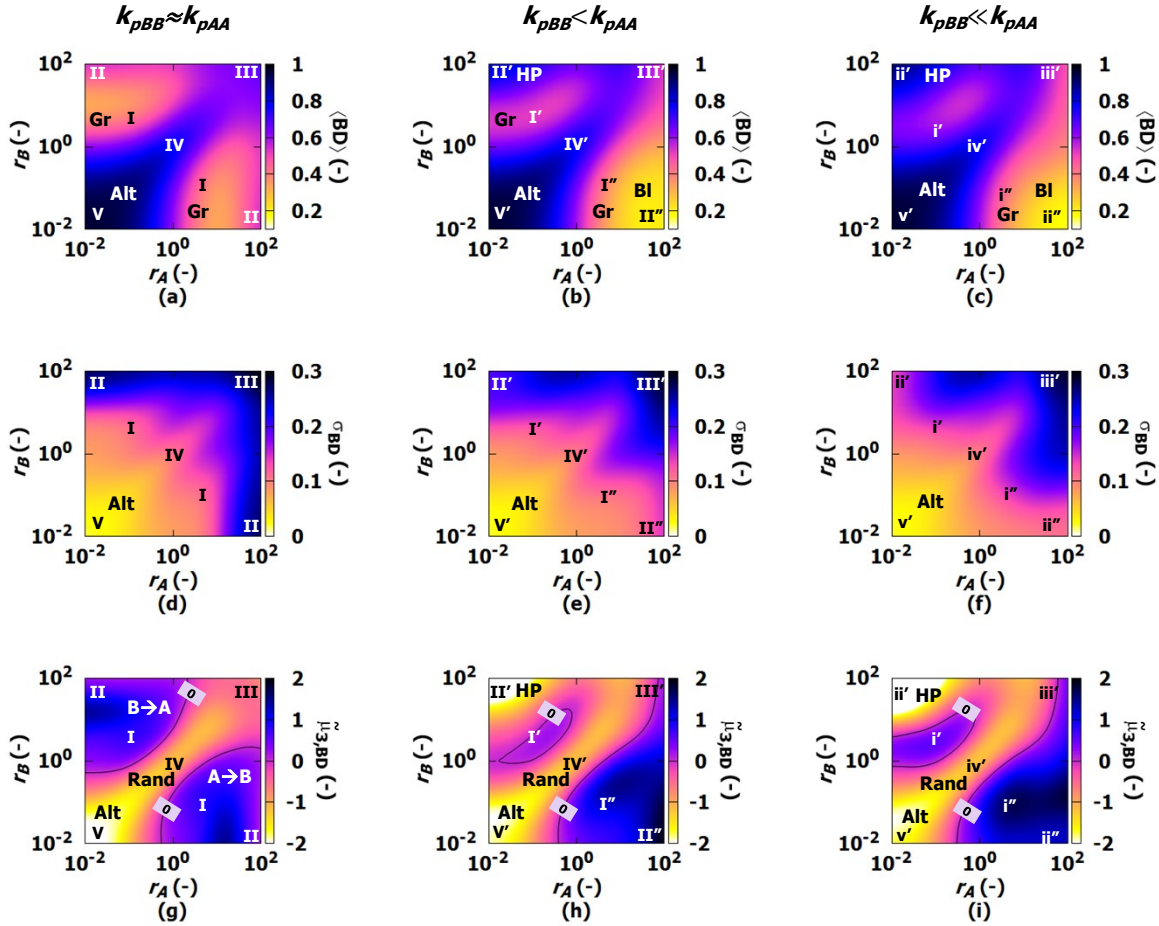

Figure S3. Extra information for Figure 5 in the main text. Relation between the (monomer) reactivity ratios  $r_A$  and  $r_B$ , and derived properties for  $^{BD}$  distributions for CROP copolymers, according to parameters in Table 1 ( $k_{i,A}=5k_{p,AA}$  and  $k_{i,B}=5k_{p,BB}$ ; target DP=100 and B-Func=50mol%). A low  $\langle BD \rangle$  (block structure) is found for copolymers with unequal homopropagation rates where  $k_{p,BB} < k_{p,AA}$  (middle and right column) and  $r_B < r_A$  (regions II'' and ii''). A low  $\sigma_{BD}$  indicates more chain analogy, like random or alternating copolymers where competition for other compositional distributions is less. While a positive  $\tilde{\mu}_{3,BD}$  value still indicates a clear A to B shift cf.  $\tilde{\mu}_{3,GD}$ , a negative  $\tilde{\mu}_{3,BD}$  can be found for homopolymeric, random and alternating copolymers but also for tapered copolymers with long segment lengths but no specific A to B transitions. Left column: equal homopropagation rate coefficients ( $k_{p,BB}=k_{p,AA}$ ; case 1); middle column: slow BB-propagation ( $k_{p,BB}=0.1k_{p,AA}$ ; case 2) right column: very slow BB-propagation ( $k_{p,BB}=0.01k_{p,AA}$ ). Specific counterplots also provided for P11-18 (see further).

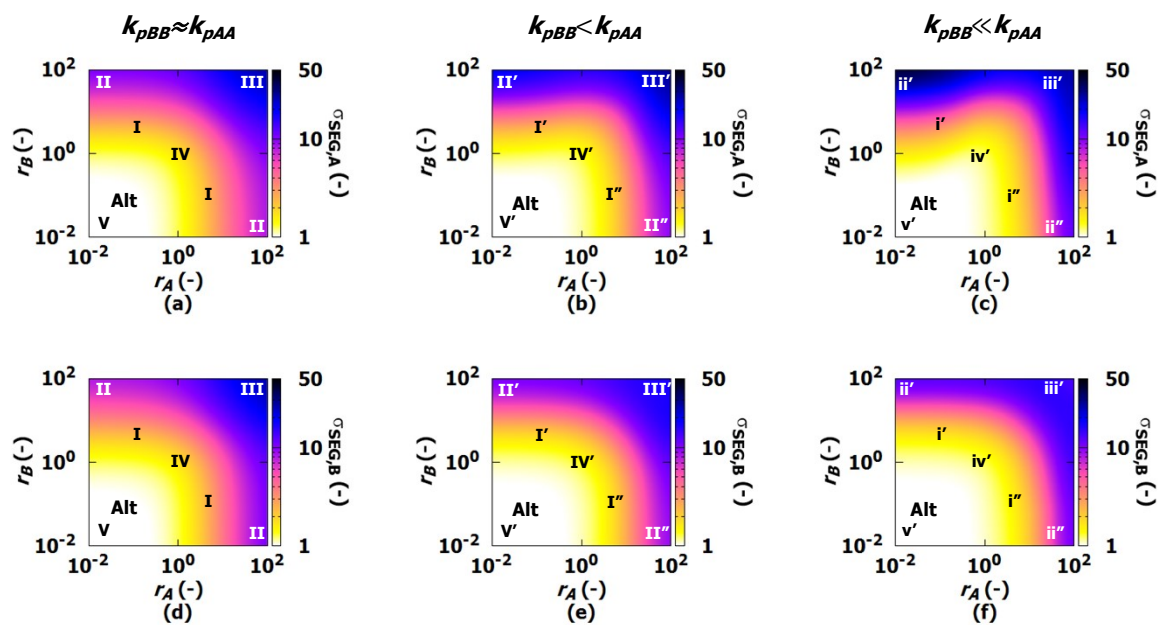

Figure S4. Complementary to Figure 6 in the main text with transitions towards non-gradient random (IV) or alternating (V) through decreased  $\sigma_{SEG,A/B}$  values, and towards block (II,II',III) or homopolymeric (II,II'',III) structures trough increased  $\sigma_{SEG,A/B}$  values, both compared to gradient structures (I,I',I''). Counter plots for values of 2, 3, 10 and 20 also provided.

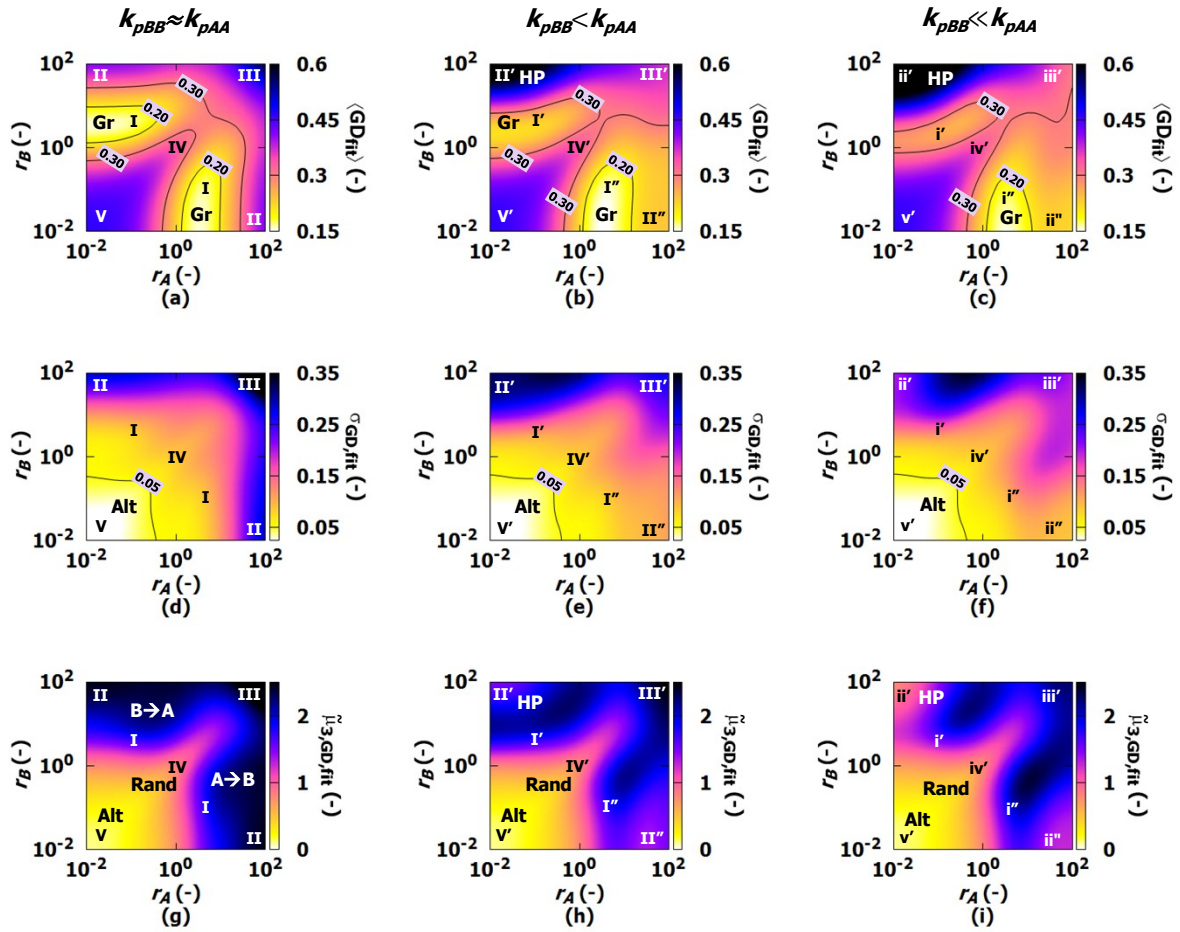

Figure S5. Extra information to Figure 5 in the main text. Relation between the reactivity ratios  $r_A$  and  $r_B$ , and the log-normally fitted  $GD_{fit}$  distributions for CROP copolymers. A low  $\langle GD_{fit} \rangle$  is found for gradient structures, while high values are typical for homopolymeric chains. A low  $\sigma_{GD,fit}$  indicates a well-defined structure, like random or alternating copolymers where competition for other compositional distributions is minimal. A  $\tilde{\mu}_{3,GD,fit}$  is always positive with log-normal distributions always being right skewed. Random, alternating and homopolymers show negative  $\tilde{\mu}_{3,GD,fit}$  positive values close to 0. Left column: equal homopropagation rate coefficients ( $k_{p,BB}=k_{p,AA}$ ); right column: slow BB-propagation ( $k_{p,BB}=0.1k_{p,AA}$ ). For all sets of kinetic parameters the  $k_{i,A}=5k_{p,AA}$  and  $k_{i,B}=5k_{p,BB}$ . Initial conditions: DP 100, B-Func=50mol%.

The  $\tilde{\mu}_{3,GD,fit}$  for the log-normal distribution is given by:<sup>1</sup>

$$\tilde{\mu}_{3,GD,fit} = \left( \exp(\sigma_{GD,fit}^2) + 2 \right) \sqrt{\exp(\sigma_{GD,fit}^2) - 1} \quad (S1)$$

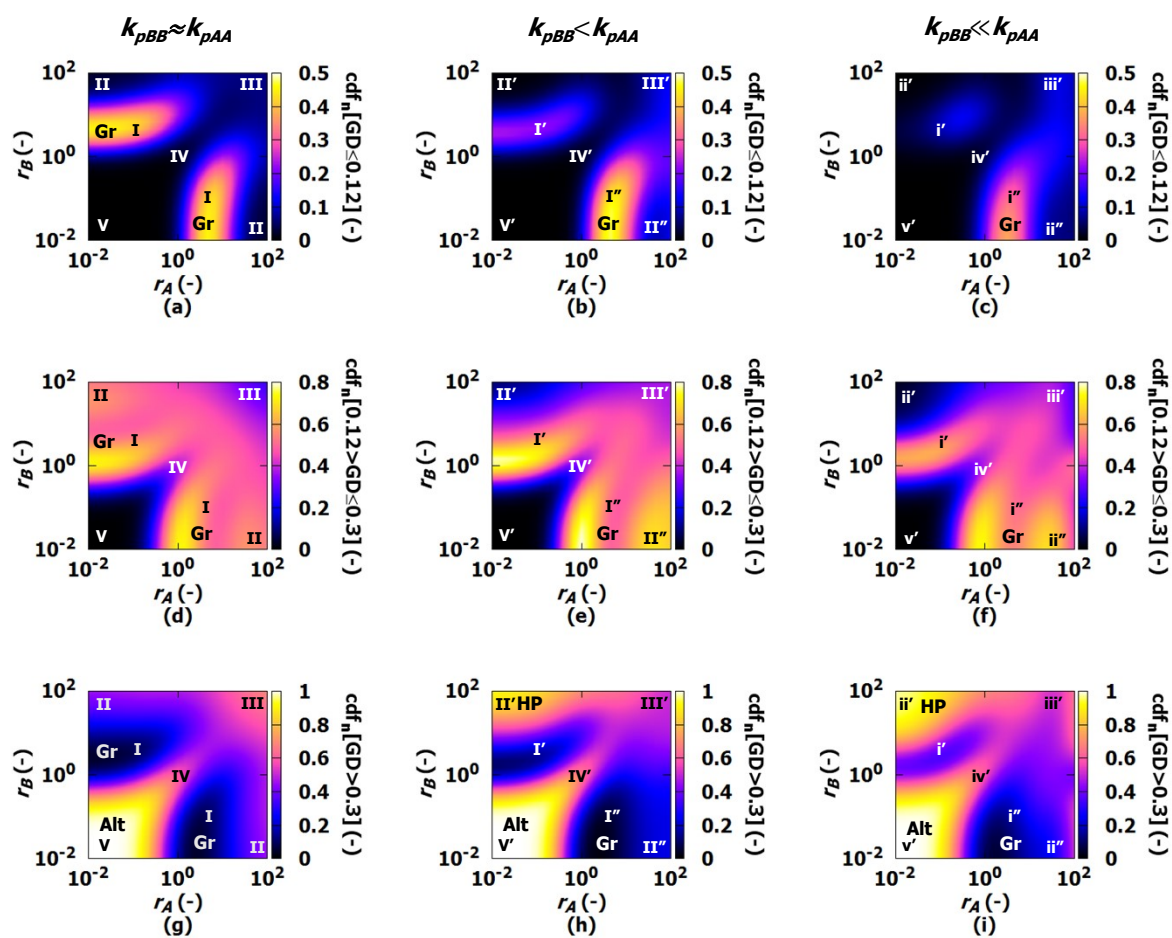

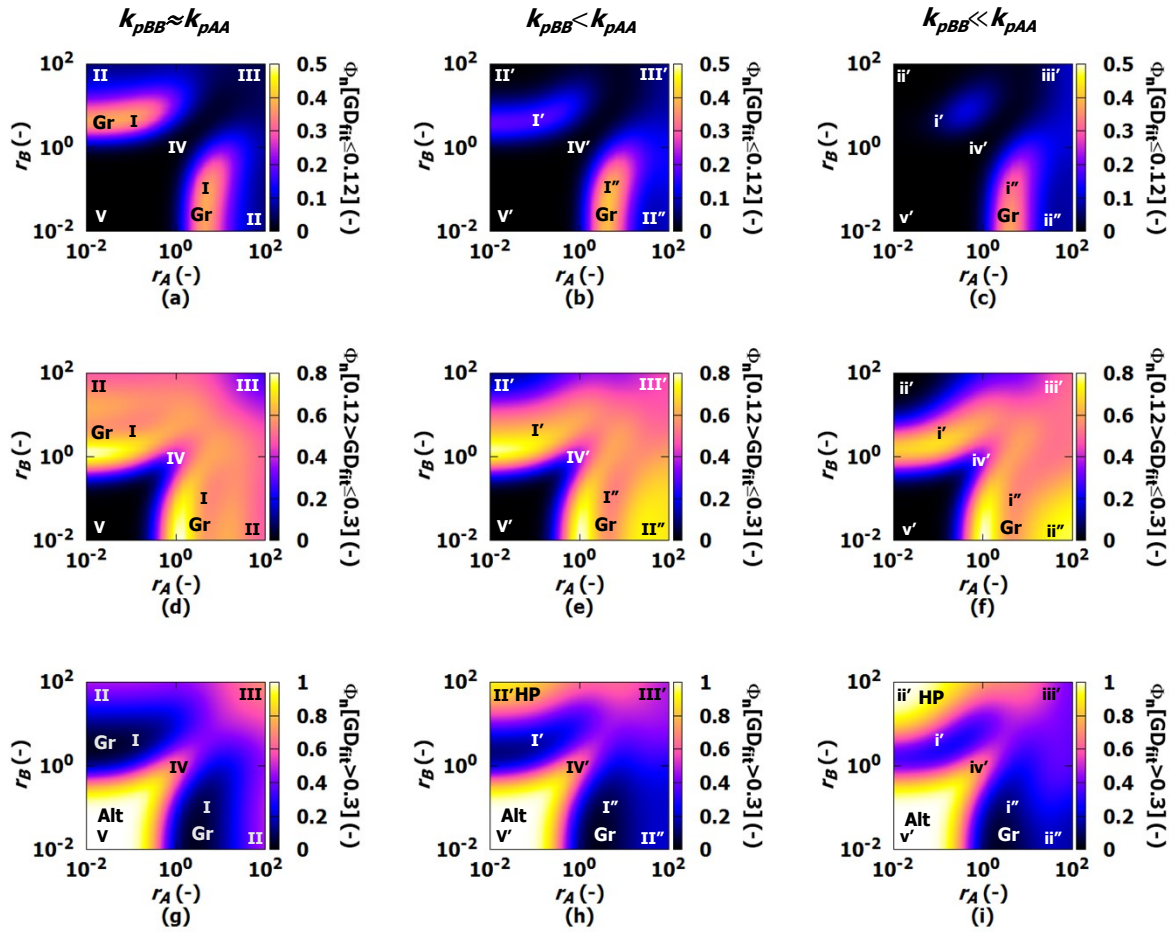

Figure S7. Relation between the reactivity ratios  $r_A$  and  $r_B$ , and the fitted  $GD$  distributions for CROP copolymers. A low  $\langle GD_{fit} \rangle$  is found for gradient structures, while high values are typical for homopolymeric chains. A low  $\sigma_{GD,fit}$  indicates a well-defined structure, like random or alternating copolymers where competition for other compositional distributions is minimal. A  $\tilde{\mu}_{3,GD,fit}$  is always positive with log-normal distributions always being right skewed. Random, alternating and homopolymers show negative  $\tilde{\mu}_{3,GD,fit}$  positive values close to 0. Left column: equal homopropagation rate coefficients ( $k_{p,BB}=k_{p,AA}$ ); right column: slow BB-propagation ( $k_{p,BB}=0.1k_{p,AA}$ ). For all sets of kinetic parameters the  $k_{i,A}=5k_{p,AA}$  and  $k_{i,B}=5k_{p,BB}$ . Initial conditions: DP 100, B-Func=50mol%.



### 3 EXTRA RESULTS FOR REAL CROP AND ATRP PRODUCTS WITHOUT SIDE REACTIONS

**Table S1. Reaction rate coefficients and monomer reactivity ratios for CROP copolymers P11-15 at 140 °C.**

| $k$ (L · mol <sup>-1</sup> · s <sup>-1</sup> ) <sup>1)</sup> | P11                   | P12                   | P13                   | P14                   | P15                   |
|--------------------------------------------------------------|-----------------------|-----------------------|-----------------------|-----------------------|-----------------------|
| $k_{i,A}$                                                    | $1.94 \cdot 10^{-2a}$ | $1.94 \cdot 10^{-2a}$ | $4.65 \cdot 10^{-2d}$ | $1.94 \cdot 10^{-2a}$ | $4.65 \cdot 10^{-2d}$ |
| $k_{i,B}$                                                    | $3.15 \cdot 10^{-3a}$ | $3.28 \cdot 10^{-2c}$ | $3.28 \cdot 10^{-2c}$ | $2.86 \cdot 10^{-2c}$ | $2.86 \cdot 10^{-2c}$ |
| $k_{p,AA}$                                                   | $1.45 \cdot 10^{-1b}$ | $1.45 \cdot 10^{-1b}$ | $3.49 \cdot 10^{-2d}$ | $3.49 \cdot 10^{-2d}$ | $3.49 \cdot 10^{-2d}$ |
| $k_{p,AB}$                                                   | $7.27 \cdot 10^{-2a}$ | $4.83 \cdot 10^{-2c}$ | $3.17 \cdot 10^{-2c}$ | $1.32 \cdot 10^{-1c}$ | $4.36 \cdot 10^{-2c}$ |
| $k_{p,BB}$                                                   | $3.15 \cdot 10^{-2b}$ | $6.56 \cdot 10^{-2b}$ | $6.56 \cdot 10^{-2b}$ | $5.71 \cdot 10^{-2b}$ | $5.71 \cdot 10^{-2b}$ |
| $k_{p,BA}$                                                   | $9.40 \cdot 10^{-1a}$ | $3.28 \cdot 10^{-1c}$ | $3.28 \cdot 10^{-1c}$ | $5.71 \cdot 10^{-1c}$ | $1.43 \cdot 10^{-1c}$ |
| $r_A$                                                        | 20 <sup>c</sup>       | 3 <sup>c</sup>        | 1.1 <sup>c</sup>      | 1.1 <sup>c</sup>      | 0.8 <sup>c</sup>      |
| $r_B$                                                        | 0.03 <sup>c</sup>     | 0.2 <sup>c</sup>      | 0.2 <sup>c</sup>      | 0.1 <sup>c</sup>      | 0.4 <sup>c</sup>      |
| $k_{trMAA}$                                                  | $2.94 \cdot 10^{-4e}$ | $2.94 \cdot 10^{-4e}$ | $6.57 \cdot 10^{-2d}$ | $2.94 \cdot 10^{-4e}$ | $6.57 \cdot 10^{-2d}$ |
| $k_{pmAA}$                                                   | $1.45 \cdot 10^{-2e}$ | $1.45 \cdot 10^{-2e}$ | $6.99 \cdot 10^{-2d}$ | $1.45 \cdot 10^{-2e}$ | $6.99 \cdot 10^{-2d}$ |
| $k_{pMidAA}$                                                 | $1.45 \cdot 10^{-1e}$ | $1.45 \cdot 10^{-1e}$ | $3.49 \cdot 10^{-1d}$ | $1.45 \cdot 10^{-1e}$ | $3.49 \cdot 10^{-1d}$ |

<sup>a</sup>Taken from Van Steenberge *et al.*<sup>3</sup> <sup>b</sup>Taken from Wiesbrock *et al.*<sup>4</sup> <sup>c</sup>Taken from Bouten *et al.*<sup>5</sup> <sup>d</sup>Taken from Arraez *et al.*<sup>6</sup> <sup>e</sup>Taken from Conka *et al.*<sup>7</sup>

**Table S2. Reaction rate coefficients and monomer reactivity ratios for ATRP copolymers P16-18 at 80 °C.**

| $k$ (L · mol <sup>-1</sup> · s <sup>-1</sup> ) <sup>1)</sup> | P16               | P17               | P18               |
|--------------------------------------------------------------|-------------------|-------------------|-------------------|
| $k_{i,A}$                                                    | $2.5 \cdot 10^5a$ | $2.5 \cdot 10^5a$ | $3.3 \cdot 10^3a$ |
| $k_{i,B}$                                                    | $6.5 \cdot 10^4a$ | $3.3 \cdot 10^3a$ | $6.5 \cdot 10^4a$ |
| $k_{p,AA}$                                                   | $5.0 \cdot 10^4b$ | $5.0 \cdot 10^4b$ | $6.6 \cdot 10^2c$ |
| $k_{p,AB}$                                                   | $1.5 \cdot 10^5d$ | $1.3 \cdot 10^6e$ | $3.3 \cdot 10^3e$ |
| $k_{p,BB}$                                                   | $1.3 \cdot 10^3f$ | $6.6 \cdot 10^2c$ | $1.3 \cdot 10^3c$ |
| $k_{p,BA}$                                                   | $4.3 \cdot 10^2d$ | $1.1 \cdot 10^3e$ | $1.6 \cdot 10^3e$ |
| $r_A$                                                        | 0.3 <sup>d</sup>  | 0.2 <sup>e</sup>  | 0.4 <sup>e</sup>  |
| $r_B$                                                        | 3.0 <sup>d</sup>  | 0.8 <sup>e</sup>  | 0.6 <sup>e</sup>  |

<sup>a</sup>Homopropagation rate coefficient multiplied by 5 to ensure a living polymerization character. <sup>b</sup>Taken from Asua *et al.*<sup>8</sup> <sup>c</sup>Taken from Buback *et al.*<sup>9</sup> <sup>d</sup>Taken from Matyjaszewski *et al.*<sup>10</sup> <sup>e</sup>Taken from Van Steenberge *et al.*<sup>3</sup> <sup>f</sup>Taken from Beuermann *et al.*<sup>11</sup>

### EtOx/C<sub>2</sub>MestOx (P13)

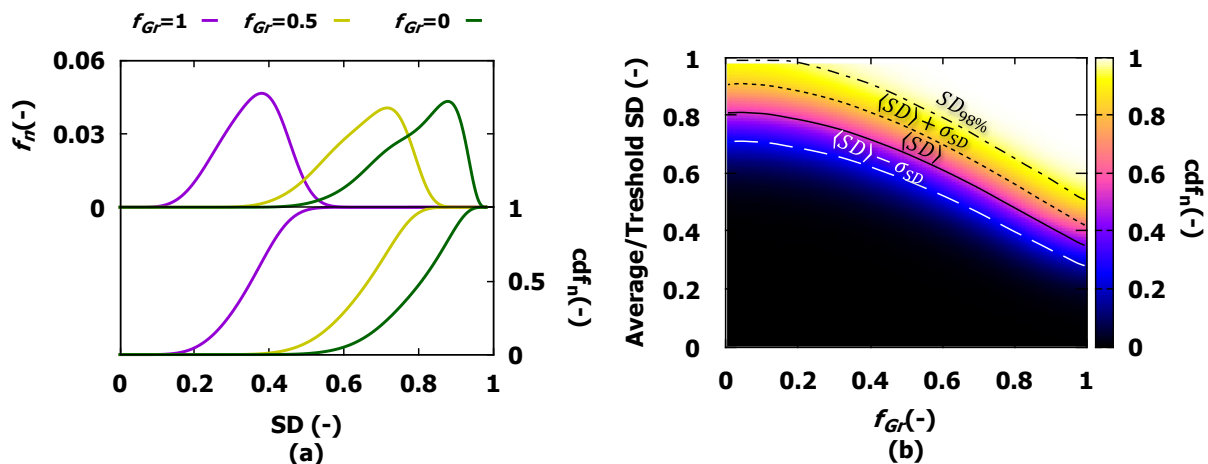

Figure S8. P13 is compared for three selected  $f_{Gr}$  values (a;  $f_{Gr}=1$ ; purple line;  $f_{Gr}=0.5$ ; yellow line;  $f_{Gr}=0$ ; green line). It follows that P13 is a 100 mol% gradient. (b) the  $^{cdf}f_n$  is measured for the full  $f_{Gr}$  spectrum further confirming the gradient character of P13 while high  $SD$  values for  $f_{Gr}=0$  (BD) indicate a strongly randomly distributed gradient copolymer.

### MeOx/C<sub>3</sub>MestOx (P14)

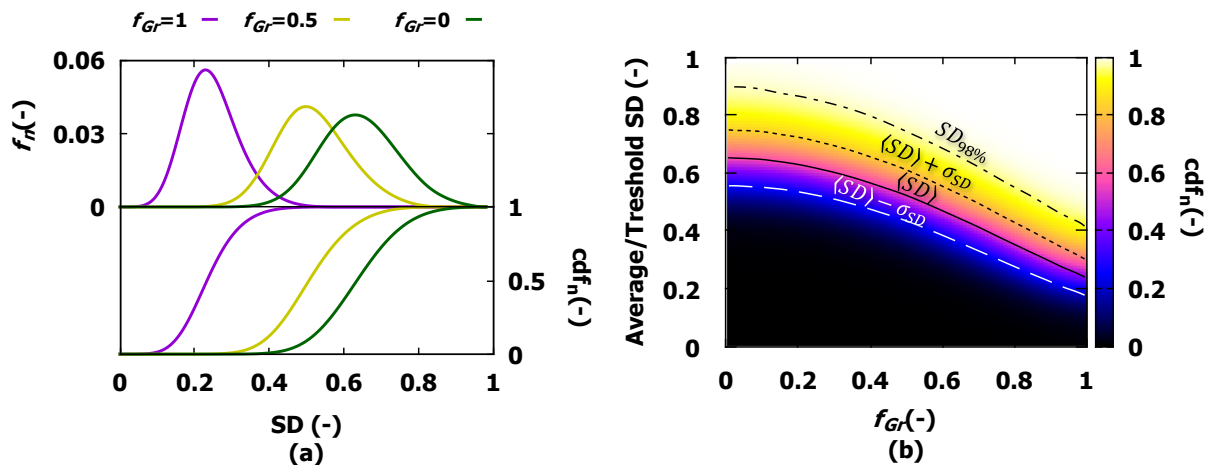

Figure S9. P14 is compared for three selected  $f_{Gr}$  values (a;  $f_{Gr}=1$ ; purple line;  $f_{Gr}=0.5$ ; yellow line;  $f_{Gr}=0$ ; green line). It follows that P14 is a 100 mol% gradient. (b) the  $^{cdf}f_n$  is measured for the full  $f_{Gr}$  spectrum further confirming the gradient character of P14 while low  $SD$  values for  $f_{Gr}=0$  (BD) indicate a less randomly distributed gradient copolymer.

### EtOx/C<sub>3</sub>MestOx (P15)

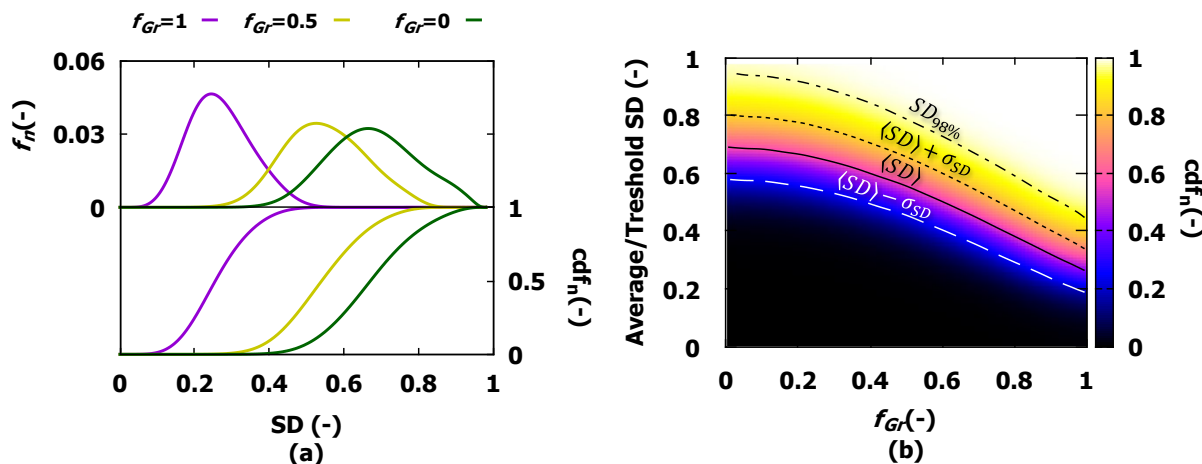

Figure S10. P15 is compared for three selected  $f_{Gr}$  values (a;  $f_{Gr}=1$ ; purple line;  $f_{Gr}=0.5$ ; yellow line;  $f_{Gr}=0$ ; green line). It follows that P15 is a 100 mol% gradient. (b) the  $cdf_n$  is measured for the full  $f_{Gr}$  spectrum further confirming the gradient character of P15 while intermediate  $SD$  values for  $f_{Gr}=0$  (BD) indicate a some randomness in the comonomer distribution of the gradient copolymer.

### nBuA/MMA (P16)

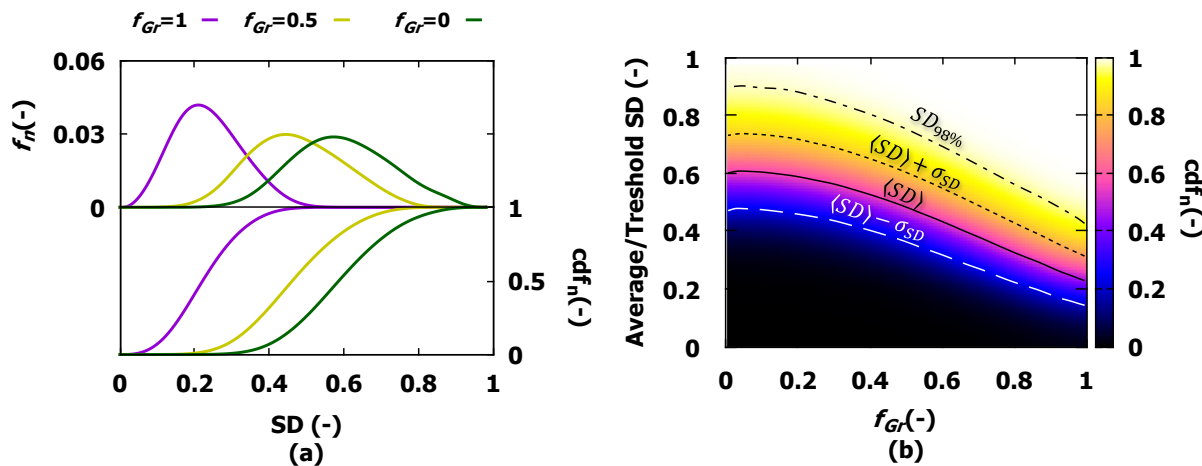

Figure S11. P16 is compared for three selected  $f_{Gr}$  values (a;  $f_{Gr}=1$ ; purple line;  $f_{Gr}=0.5$ ; yellow line;  $f_{Gr}=0$ ; green line). It follows that P16 is a 100 mol% gradient. (b) the  $cdf_n$  is measured for the full  $f_{Gr}$  spectrum further confirming the gradient character of P16 while low  $SD$  values for  $f_{Gr}=0$  (BD) indicate a less randomly distributed gradient copolymer.

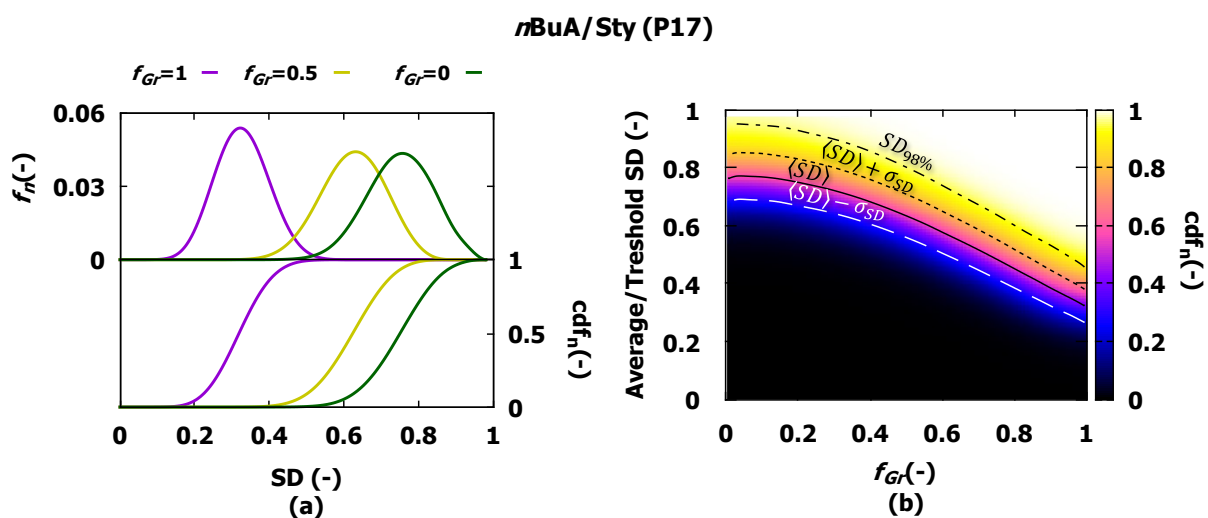

Figure S12. P17 is compared for three selected  $f_{Gr}$  values (a;  $f_{Gr}=1$ ; purple line;  $f_{Gr}=0.5$ ; yellow line;  $f_{Gr}=0$ ; green line). It follows that P17 is a 100 mol% gradient. (b) the  $^{cdf}f_n$  is measured for the full  $f_{Gr}$  spectrum further confirming the gradient character of P17 while high  $SD$  values for  $f_{Gr}=0$  ( $BD$ ) indicate a strongly randomly distributed gradient copolymer.

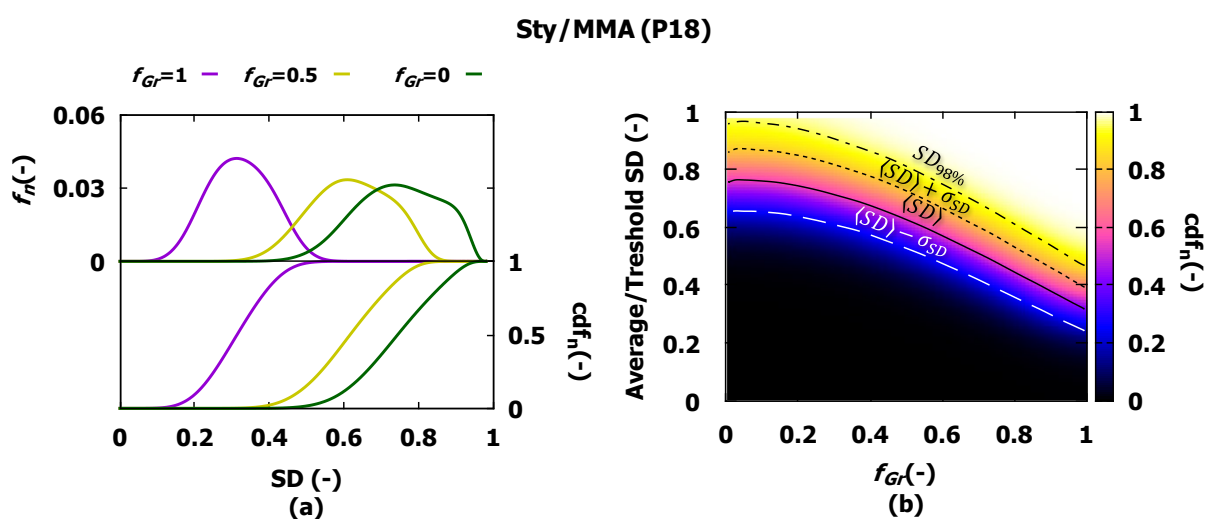

Figure S13. P18 is compared for three selected  $f_{Gr}$  values (a;  $f_{Gr}=1$ ; purple line;  $f_{Gr}=0.5$ ; yellow line;  $f_{Gr}=0$ ; green line). It follows that P18 is a 100 mol% gradient. (b) the  $^{cdf}f_n$  is measured for the full  $f_{Gr}$  spectrum further confirming the gradient character of P18 while high  $SD$  values for  $f_{Gr}=0$  ( $BD$ ) indicate a strongly randomly distributed gradient copolymer.

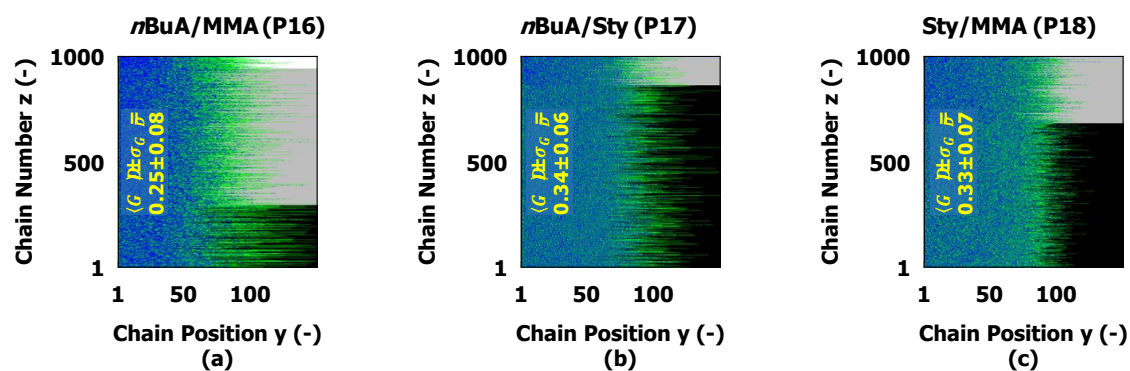

Figure S14. Monomer sequences for the  $f_{Gr}=1; f_{Bl}=0$  A(blue)/B(green) ATRP products *n*BuA/MMA (P16; subplot (a)), *n*BuA/Sty (P17; subplot (b)), Sty/MMA (P18; subplot (c)).

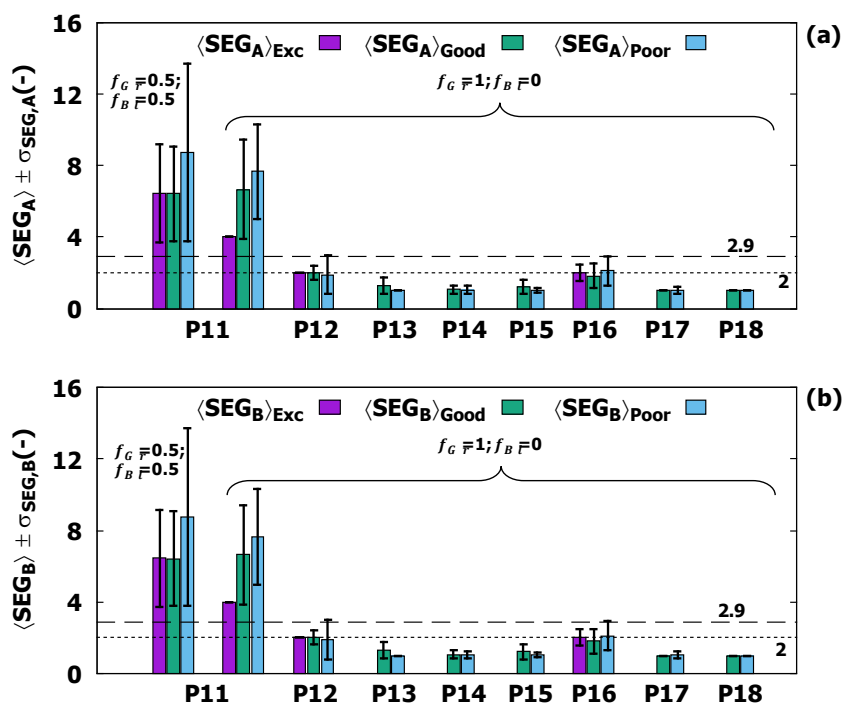

Figure S15. Decrease in structural quality from excellent (purple bars) to good (green bars) to poor (blue bars), shows an increase in  $\langle SEG_A \rangle$  (a) and  $\langle SEG_B \rangle$  (b) for the blocky P11 and a stagnation or even decrease in  $\langle SEG_A \rangle$  (a) and  $\langle SEG_B \rangle$  (b) for the more random products P12-18.

## 4 EXTRA RESULTS FOR REAL CROP PRODUCTS WITH SIDE REACTIONS

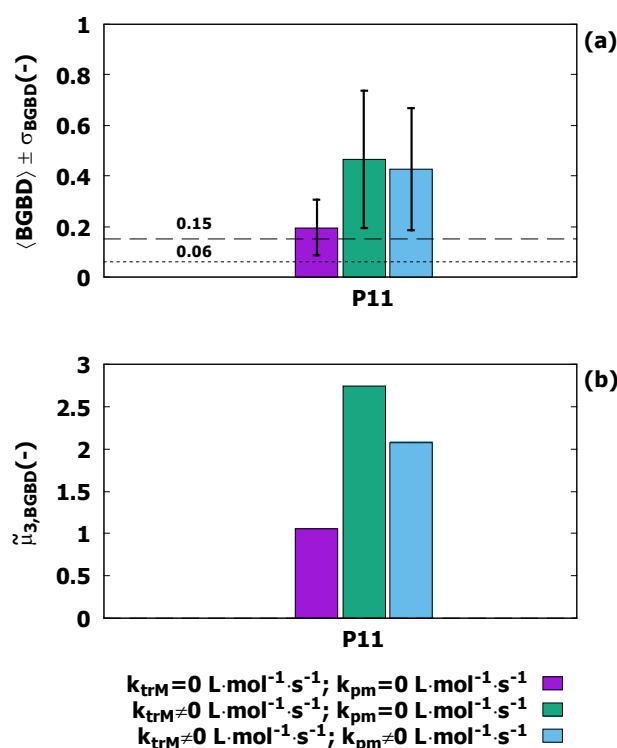

Figure S16. A histogram showing (a)  $\langle B_{GBD} \rangle \pm \sigma_{B_{GBD}}$  and (b)  $\tilde{\mu}_{3,B_{GBD}}$  for P11 without side reactions (purple) which leads to the targeted product exclusively, only with chain transfer to monomer (green) which also form linear side products, and with macropropagation (cyan) which also forms branched side products.

## 5 REFERENCES

- 1 Holgate, P. Lognormal Distributions: Theory and Applications. *Journal of The Royal Statistical Society Series A-statistics in Society* **152**, 256-256 (1989).
- 2 Conka, R., Marien, Y. W., Van Steenberge, P. H. M., Hoogenboom, R. & D'Hooge, D. R. An equation driven quality classification of (a)symmetric gradient, gradient-block, block-gradient-block and block copolymers. *European Polymer Journal*, 111769, doi:<https://doi.org/10.1016/j.eurpolymj.2022.111769> (2022).
- 3 Van Steenberge, P. H., Verbraeken, B., Reyniers, M.-F., Hoogenboom, R. & D'hooge, D. R. Model-based visualization and understanding of monomer sequence formation in gradient copoly (2-oxazoline) s on the basis of 2-methyl-2-oxazoline and 2-phenyl-2-oxazoline. *Macromolecules* **48**, 7765-7773 (2015).
- 4 Wiesbrock, F. *et al.* Microwave-assisted synthesis of a 42-membered library of diblock copoly (2-oxazoline) s and chain-extended homo poly (2-oxazoline) s and their thermal characterization. *Macromolecules* **38**, 7957-7966 (2005).
- 5 Bouten, P. J. M. *et al.* Synthesis of poly(2-oxazoline)s with side chain methyl ester functionalities: Detailed understanding of living copolymerization behavior of methyl ester containing monomers with 2-alkyl-2-oxazolines. *Journal of Polymer Science Part A: Polymer Chemistry* **53**, 2649-2661, doi:<https://doi.org/10.1002/pola.27733> (2015).
- 6 Arraez, F. J. *et al.* Macropropagation Rate Coefficients and Branching Levels in Cationic Ring-Opening Polymerization of 2-Ethyl-2-oxazoline through Prediction of Size Exclusion

- Chromatography Data. *Macromolecules* **52**, 4067-4078, doi:10.1021/acs.macromol.9b00544 (2019).
- 7 Conka, R. *et al.* A unified kinetic Monte Carlo approach to evaluate (a)symmetric block and gradient copolymers with linear and branched chains illustrated for poly(2-oxazoline)s. *Polymer Chemistry* **13**, 1559-1575, doi:10.1039/D1PY01391B (2022).
- 8 Asua, J. M. *et al.* Critically Evaluated Rate Coefficients for Free-Radical Polymerization, 5. *Macromolecular Chemistry and Physics* **205**, 2151-2160, doi:<https://doi.org/10.1002/macp.200400355> (2004).
- 9 Buback, M. *et al.* Critically evaluated rate coefficients for free-radical polymerization, 1. Propagation rate coefficient for styrene. *Macromolecular chemistry and physics* **196**, 3267-3280 (1995).
- 10 Matyjaszewski, K., Ziegler, M. J., Arehart, S. V., Greszta, D. & Pakula, T. Gradient copolymers by atom transfer radical copolymerization. *Journal of Physical Organic Chemistry* **13**, 775-786, doi:[https://doi.org/10.1002/1099-1395\(200012\)13:12<775::AID-POC314>3.0.CO;2-D](https://doi.org/10.1002/1099-1395(200012)13:12<775::AID-POC314>3.0.CO;2-D) (2000).
- 11 Beuermann, S. *et al.* Critically evaluated rate coefficients for free-radical polymerization, 2.. Propagation rate coefficients for methyl methacrylate. *Macromolecular Chemistry and Physics* **198**, 1545-1560 (1997).
